# Supplementary material
Source: ML conference proceedings conference paper supplement (https://proceedings.neurips.cc/paper_files/paper/2018/hash/ccb1d45fb76f7c5a0bf619f979c6cf36-Abstract.html)
Supplement: Supplementary file [file ccb1d45fb76f7c5a0bf619f979c6cf36-Supplemental.zip]

# Domain-Invariant Projection Learning for Zero-Shot Recognition (Supplementary Material)

An Zhao<sup>1,•</sup> Mingyu Ding<sup>1,•</sup> Jiechao Guan<sup>1,•</sup> Zhiwu Lu<sup>1,\*</sup> Tao Xiang<sup>2,3</sup> Ji-Rong Wen<sup>1</sup>

<sup>1</sup>Beijing Key Laboratory of Big Data Management and Analysis Methods  
School of Information, Renmin University of China, Beijing 100872, China

<sup>2</sup>School of EECS, Queen Mary University of London, London E1 4NS, U.K.

<sup>3</sup>Samsung AI Centre, Cambridge, U.K.

zhiwu.lu@gmail.com      t.xiang@qmul.ac.uk

• Equal contribution      \* Corresponding author

## 1 Algorithm Analysis

In this section, we provide a rigorous analysis on the properties and behaviours of the optimisation algorithm formulated in Section 3.3 (Algorithm 1) of the main paper.

**Proposition 1** *Eq. (9) has and only has one solution.*

*Proof.* Because  $\beta > 0$ ,  $\hat{\mathbf{A}}^{(t)}$  is positive definite, i.e.,  $\lambda_i^a \geq \beta > 0$  ( $i = 1, \dots, d$ ). Similarly,  $\hat{\mathbf{B}}^{(t)}$  is positive semidefinite, i.e., all of its eigenvalues satisfy:  $\lambda_j^b \geq 0$  ( $j = 1, \dots, k$ ). The eigenvalue decompositions of  $\hat{\mathbf{A}}^{(t)}$  and  $\hat{\mathbf{B}}^{(t)}$  are denoted as:  $\hat{\mathbf{A}}^{(t)} = V \Sigma_A V^T$  ( $\Sigma_A = \text{diag}\{\lambda_1^a, \dots, \lambda_d^a\}$ ,  $V^T V = I$ ),  $\hat{\mathbf{B}}^{(t)} = U \Sigma_B U^T$  ( $\Sigma_B = \text{diag}\{\lambda_1^b, \dots, \lambda_k^b\}$ ,  $U^T U = I$ ). Therefore, Eq. (9) is reformulated as:  $\Sigma_A V^T \mathbf{W}^{(t+1)} U + V^T \mathbf{W}^{(t+1)} U \Sigma_B = V^T \hat{\mathbf{C}}^{(t)} U$ . Let  $\overline{\mathbf{W}} = V^T \mathbf{W}^{(t+1)} U$  and  $\overline{\mathbf{C}} = V^T \hat{\mathbf{C}}^{(t)} U$ . We have:  $\Sigma_A \overline{\mathbf{W}} + \overline{\mathbf{W}} \Sigma_B = \overline{\mathbf{C}}$ , i.e.,  $(\lambda_i^a + \lambda_j^b) \overline{w}_{ij} = \overline{c}_{ij}$  ( $i = 1, \dots, d$ ;  $j = 1, \dots, k$ ). Since  $\lambda_i^a + \lambda_j^b > 0$  and  $\overline{\mathbf{W}} = V^T \mathbf{W}^{(t+1)} U$ , Eq. (9) has and only has one solution.  $\square$

**Proposition 2** *Given  $\Delta \mathbf{W}^{(t)} = \mathbf{W}^{(t+1)} - \mathbf{W}^{(t)}$ , we have:  $\lim_{t \rightarrow +\infty} \|\Delta \mathbf{W}^{(t)}\|_F^2 = 0$ , i.e., Algorithm 1 is a convergent iterative algorithm.*

*Proof.* Without loss of generality, we normalize all of  $\|\mathbf{x}_i^{(s)}\|_2^2$ ,  $\|\mathbf{x}_i^{(u)}\|_2^2$ ,  $\|\mathbf{y}_j^{(s)}\|_2^2$ , and  $\|\mathbf{y}_j^{(u)}\|_2^2$  to 1 (see Eqs. (6)–(8)). We can easily have:  $\|\Delta \hat{\mathbf{A}}^{(t-1)}\|_F^2 = \|\hat{\mathbf{A}}^{(t)} - \hat{\mathbf{A}}^{(t-1)}\|_F^2 \leq \alpha_{t-1} \Delta \hat{\mathbf{A}}$ ,  $\|\Delta \hat{\mathbf{B}}^{(t-1)}\|_F^2 = \|\hat{\mathbf{B}}^{(t)} - \hat{\mathbf{B}}^{(t-1)}\|_F^2 \leq \alpha_{t-1} \Delta \hat{\mathbf{B}}$ , and  $\|\Delta \hat{\mathbf{C}}^{(t-1)}\|_F^2 = \|\hat{\mathbf{C}}^{(t)} - \hat{\mathbf{C}}^{(t-1)}\|_F^2 \leq \alpha_{t-1} \Delta \hat{\mathbf{C}}$ , where  $\Delta \hat{\mathbf{A}}$ ,  $\Delta \hat{\mathbf{B}}$ , and  $\Delta \hat{\mathbf{C}}$  are all positive constants. Moreover, according to the proof of Prop. 1, we have:  $(\lambda_i^a + \lambda_j^b) \overline{w}_{ij} = \overline{c}_{ij}$  ( $i = 1, \dots, d$ ;  $j = 1, \dots, k$ ). Given that  $\lambda_i^a + \lambda_j^b \geq \beta > 0$ , we have:  $|\overline{w}_{ij}| \leq |\overline{c}_{ij}|/\beta$ . Since  $\overline{\mathbf{W}} = V^T \mathbf{W}^{(t+1)} U$  and  $\overline{\mathbf{C}} = V^T \hat{\mathbf{C}}^{(t)} U$ , we have:  $\|\mathbf{W}^{(t+1)}\|_F^2 \leq \|\hat{\mathbf{C}}^{(t)}\|_F^2 / \beta^2 \leq M_C / \beta^2$ , where  $M_C$  is a positive constant. By subtracting Eq. (9) at  $t-1$  from Eq. (9) at  $t$ , we thus obtain:  $\hat{\mathbf{A}}^{(t)} \Delta \mathbf{W}^{(t)} + \Delta \mathbf{W}^{(t)} \hat{\mathbf{B}}^{(t)} = \Delta \hat{\mathbf{D}}^{(t-1)}$ , where  $\Delta \hat{\mathbf{D}}^{(t-1)} = \Delta \hat{\mathbf{C}}^{(t-1)} - \Delta \hat{\mathbf{A}}^{(t-1)} \mathbf{W}^{(t)} - \mathbf{W}^{(t)} \Delta \hat{\mathbf{B}}^{(t-1)}$ . According to the proof that  $\|\mathbf{W}^{(t+1)}\|_F^2 \leq \|\hat{\mathbf{C}}^{(t)}\|_F^2 / \beta^2$ , we can similarly obtain:  $\|\Delta \mathbf{W}^{(t)}\|_F^2 \leq \|\Delta \hat{\mathbf{D}}^{(t-1)}\|_F^2 / \beta^2$ . Since  $\|\Delta \hat{\mathbf{D}}^{(t-1)}\|_F^2 \leq \alpha_{t-1} [\Delta \hat{\mathbf{C}} + (\Delta \hat{\mathbf{A}} + \Delta \hat{\mathbf{B}}) M_C / \beta^2]$  and  $\lim_{t \rightarrow +\infty} \alpha_{t-1} = 0$ , we have:  $\lim_{t \rightarrow +\infty} \|\Delta \mathbf{W}^{(t)}\|_F^2 = 0$ .  $\square$
